# Supplementary material
Source: publisher site journal article supplement (https://www.dovepress.com/article/357393)
Supplement: Supplementary file 1 [file get_supplementary_file.php]

**Supplementary Figure 1** Flowchart of patient disposition

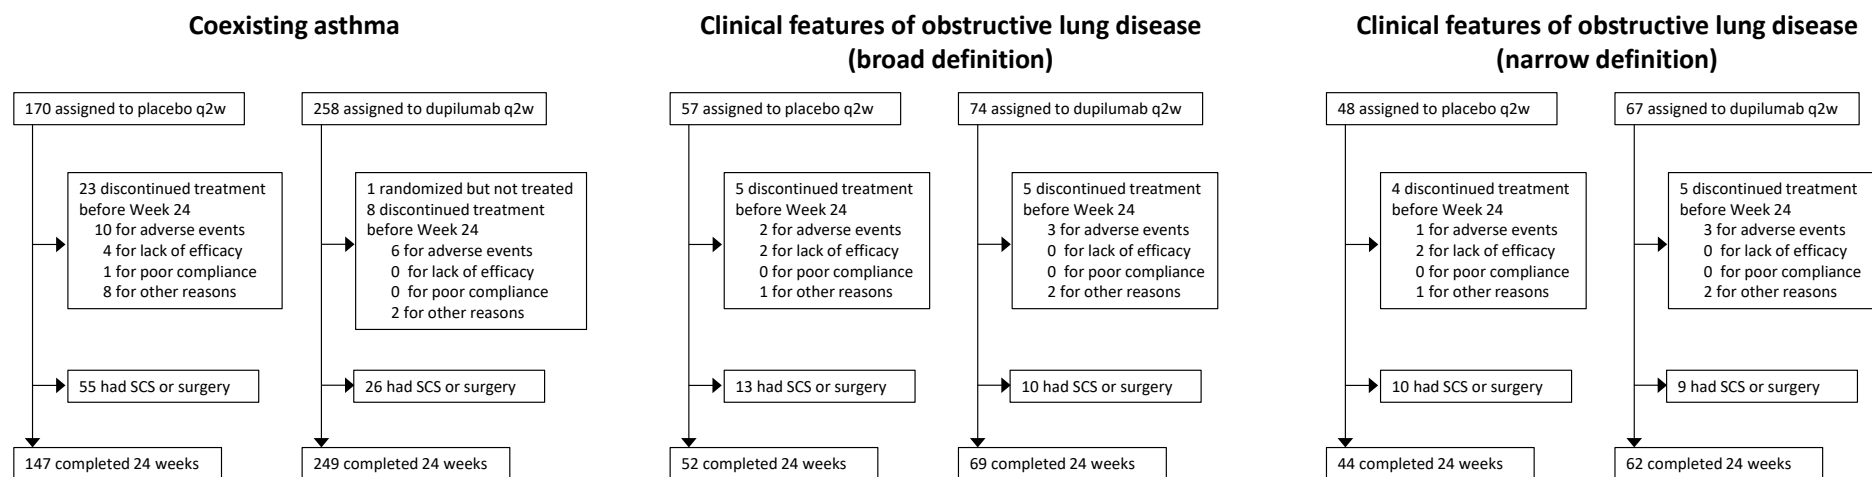

**Abbreviations:** SCS, systemic corticosteroids; q2w, every 2 weeks

**Supplementary Table 1** Effect of dupilumab on lung function as assessed by pre-bronchodilator FEV<sub>1</sub> and FEV<sub>1</sub>/FVC in patients with CRSwNP with asthma and in patients with CRSwNP, asthma, and clinical features of obstructive lung disease

|                                        | <b>Asthma and clinical features of obstructive lung disease</b> |                        |                           |                       |                            |                       |
|----------------------------------------|-----------------------------------------------------------------|------------------------|---------------------------|-----------------------|----------------------------|-----------------------|
|                                        | <b>Asthma</b>                                                   |                        | <b>(Broad Definition)</b> |                       | <b>(Narrow Definition)</b> |                       |
|                                        | Placebo<br>(n = 170)                                            | Dupilumab<br>(n = 258) | Placebo<br>(n = 40)       | Dupilumab<br>(n = 50) | Placebo<br>(n = 31)        | Dupilumab<br>(n = 43) |
| <b>FEV<sub>1</sub></b>                 |                                                                 |                        |                           |                       |                            |                       |
| Baseline, n                            | 169                                                             | 258                    | 40                        | 50                    | 31                         | 43                    |
| FEV <sub>1</sub> , mean (SD), L        | 2.62 (0.83)                                                     | 2.61 (0.92)            | 2.45 (0.76)               | 2.43 (0.92)           | 2.36 (0.76)                | 2.33 (0.79)           |
| Week 16, n                             | 166                                                             | 253                    | 40                        | 49                    | 31                         | 42                    |
| FEV <sub>1</sub> , mean (SD), L        | 2.57 (0.81)                                                     | 2.76 (0.86)            | 2.35 (0.83)               | 2.69 (0.83)           | 2.28 (0.88)                | 2.67 (0.87)           |
| LS mean change from baseline (SE)      | -0.07 (0.03)                                                    | 0.15 (0.03)            | -0.07 (0.08)              | 0.31 (0.08)           | -0.04 (0.10)               | 0.36 (0.11)           |
| LS mean difference vs placebo (95% CI) | 0.22 (0.15, 0.29)                                               |                        | 0.38 (0.17, 0.59)         |                       | 0.40 (0.20, 0.61)          |                       |
| Nominal p vs placebo                   | <0.0001                                                         |                        | 0.0004                    |                       | 0.0001                     |                       |
| Week 24, n                             | 163                                                             | 252                    | 40                        | 49                    | 31                         | 42                    |
| FEV <sub>1</sub> , mean (SD), L        | 2.57 (0.80)                                                     | 2.76 (0.91)            | 2.40 (0.83)               | 2.66 (0.81)           | 2.34 (0.88)                | 2.65 (0.84)           |
| LS mean change from baseline (SE)      | -0.07 (0.04)                                                    | 0.14 (0.03)            | -0.03 (0.08)              | 0.27 (0.08)           | -0.02 (0.09)               | 0.28 (0.10)           |
| LS mean difference vs placebo (95% CI) | 0.21 (0.13, 0.29)                                               |                        | 0.29 (0.09, 0.49)         |                       | 0.30 (0.11, 0.49)          |                       |
| Nominal p vs placebo                   | <0.0001                                                         |                        | 0.0039                    |                       | 0.0016                     |                       |
| <b>FEV<sub>1</sub>/FVC</b>             |                                                                 |                        |                           |                       |                            |                       |
| Baseline, n                            | 169                                                             | 258                    | 40                        | 50                    | 31                         | 43                    |
| FEV <sub>1</sub> /FVC, mean (SD)       | 0.72 (0.10)                                                     | 0.71 (0.10)            | 0.68 (0.10)               | 0.65 (0.09)           | 0.64 (0.09)                | 0.62 (0.07)           |
| Week 16, n                             | 166                                                             | 253                    | 40                        | 49                    | 31                         | 42                    |
| FEV <sub>1</sub> /FVC, mean (SD)       | 0.72 (0.10)                                                     | 0.73 (0.09)            | 0.67 (0.12)               | 0.69 (0.08)           | 0.64 (0.12)                | 0.68 (0.08)           |

|                                        |                   |             |                   |             |                   |             |
|----------------------------------------|-------------------|-------------|-------------------|-------------|-------------------|-------------|
| LS mean change from baseline (SE)      | <0.01 (0.01)      | 0.02 (0.01) | <0.01 (0.01)      | 0.05 (0.01) | 0.03 (0.02)       | 0.09 (0.02) |
| LS mean difference vs placebo (95% CI) | 0.03 (0.01, 0.04) |             | 0.05 (0.02, 0.08) |             | 0.06 (0.03, 0.10) |             |
| Nominal p vs placebo                   | <0.0001           |             | 0.0024            |             | 0.0003            |             |
| Week 24, n                             | 163               | 252         | 40                | 49          | 31                | 42          |
| FEV <sub>1</sub> /FVC, mean (SD)       | 0.72 (0.10)       | 0.74 (0.09) | 0.67 (0.12)       | 0.69 (0.07) | 0.65 (0.12)       | 0.67 (0.06) |
| LS mean change from baseline (SE)      | <0.01 (0.01)      | 0.02 (0.01) | <0.01 (0.01)      | 0.04 (0.01) | 0.02 (0.02)       | 0.06 (0.02) |
| LS mean difference vs placebo (95% CI) | 0.02 (0.01, 0.04) |             | 0.04 (0.01, 0.07) |             | 0.04 (0.01, 0.08) |             |
| Nominal p vs placebo                   | 0.0014            |             | 0.0235            |             | 0.0152            |             |

**Notes:** Patients with baseline and post-baseline FEV<sub>1</sub> and FVC assessments at either Week 16 or Week 24 were included in the analysis.

**Abbreviations:** CI, confidence interval; CRSwNP, chronic rhinosinusitis with nasal polyps; FEV<sub>1</sub>, forced expiratory volume in 1 second; FVC, forced vital capacity; LS, least squares; SD, standard deviation; SE, standard error.
